# Supplementary material for: Carbon recovery dynamics following disturbance by selective logging in Amazonian forests
Source: eLife. 2016 Dec 20;5:e21394. doi: 10.7554/eLife.21394 (PMC5217754; doi:10.7554/eLife.21394)
Supplement: Figure 2—source data 1. — Columns are the 2.5%, 10%, 50%, 90% and 97.5% quantiles of the posterior distribution of the model parameters (rows). DOI: http://dx.doi.org/10.7554/eLife.21394.006 [file elife-21394-fig2-data1.xlsx]

## Sheet: Parameters summary
Quantiles	2.5%	0.1	0.5	0.8	97.5%
α_sg_0	116.157	119.635	126.623	131.243	137.891
sd_α_sg	29.0261	30.3446	33.1572	35.2229	38.3441
β_sg_0	0.0180543	0.0186408	0.0199084	0.0208286	0.0219635
λ_sg_loss	-0.00274731	-0.00241394	-0.00173338	-0.0012478	-0.00063254
λ_sg_acs0	0.0023387	0.00264764	0.00318136	0.00348533	0.00386386
λ_sg_dacs	2.99793e-05	0.000306051	0.000787747	0.00108049	0.00142859
λ_sg_prec	0.00037808	0.000884692	0.00195871	0.00269012	0.00366866
λ_sg_seas	-0.00371851	-0.0033514	-0.00263195	-0.00217786	-0.0015827
λ_sg_bd	-0.00277878	-0.00235969	-0.00165558	-0.00120418	-0.000582897
β_sl_0	0.00673135	0.00689907	0.00721326	0.00742957	0.00770991
λ_sl_loss	-2.53599e-05	6.57643e-05	0.000255375	0.000379439	0.000551539
λ_sl_acs0	-0.00122862	-0.00107961	-0.000786035	-0.000607971	-0.000371325
λ_sl_dacs	-0.000976613	-0.000879008	-0.00070145	-0.000590034	-0.00044843
λ_sl_prec	-0.000871552	-0.000692721	-0.000354422	-0.000129332	0.000154039
λ_sl_seas	-0.00176558	-0.00166929	-0.00140988	-0.00122154	-0.000971367
λ_sl_bd	-0.000228341	-7.74317e-05	0.000198028	0.00038505	0.000636848
α_rr_0	0.250384	0.268915	0.309179	0.33837	0.383814
sd_α_rr	0.0614459	0.0698151	0.0922959	0.11311	0.146473
η	2.15366	2.2904	2.63967	2.84599	2.97206
β_rr_0	0.0819293	0.0891309	0.10212	0.112361	0.127637
sd_β_rr	0.0022895	0.00272366	0.0037478	0.00471857	0.00653429
λ_rr_loss	-0.0542824	-0.048788	-0.0397096	-0.0336093	-0.0243118
λ_rr_acs0	-0.0193614	-0.0110746	0.00327921	0.010658	0.019979
λ_rr_dacs	0.00190096	0.00575048	0.0130576	0.0175413	0.0230683
λ_rr_prec	-0.0209243	-0.0140588	0.000574803	0.00892145	0.0212139
λ_rr_seas	-0.000798487	0.00466626	0.0148649	0.0212049	0.0277831
λ_rr_bd	-0.0175394	-0.0110614	0.00121508	0.00875412	0.0179483
α_rg_0	0.789736	0.941876	1.23442	1.40873	1.68048
sd_α_rg	0.526725	0.58478	0.735946	0.875286	1.17944
β_rg_0	0.0447997	0.0470454	0.051687	0.0548254	0.0591144
sd_β_rg	0.000572112	0.000643238	0.000773044	0.000896811	0.00109222
λ_rg_loss	0.00729085	0.00999006	0.0149693	0.017873	0.0214883
λ_rg_acs0	-0.014113	-0.0133639	-0.011606	-0.0100481	-0.00710848
λ_rg_dacs	-0.0114898	-0.00997319	-0.00613388	-0.00341791	-0.000340074
λ_rg_prec	-0.0123658	-0.0107678	-0.00611344	-0.00189179	0.0033183
λ_rg_seas	-0.00546494	-0.00298702	0.00190761	0.00540453	0.00939347
λ_rg_bd	-0.0124197	-0.0109277	-0.00626541	-0.00307937	0.0011807
β_rl_0	0.0113204	0.0123268	0.0143018	0.0156186	0.0177567
sd_β_rl	0.000178627	0.000196248	0.000230353	0.000259453	0.000307138
λ_rl_loss	-0.00197805	-0.000943153	0.00110223	0.00249463	0.00463928
λ_rl_acs0	-0.00387895	-0.00349831	-0.00257773	-0.00159679	-4.31354e-05
λ_rl_dacs	-0.00255479	-0.00185396	-0.000141447	0.00108491	0.00228831
λ_rl_prec	-0.00346722	-0.00298951	-0.00138672	0.000210365	0.00244671
λ_rl_seas	-0.000106622	0.00088921	0.00250355	0.00321457	0.00398494
λ_rl_bd	-0.0034208	-0.00272338	-0.000833374	0.00054664	0.00218617
