# Supplementary figures and images for: Carbon recovery dynamics following disturbance by selective logging in Amazonian forests
Source: eLife journal article supplement (doi:10.7554/elife.21394), 2016-12-19

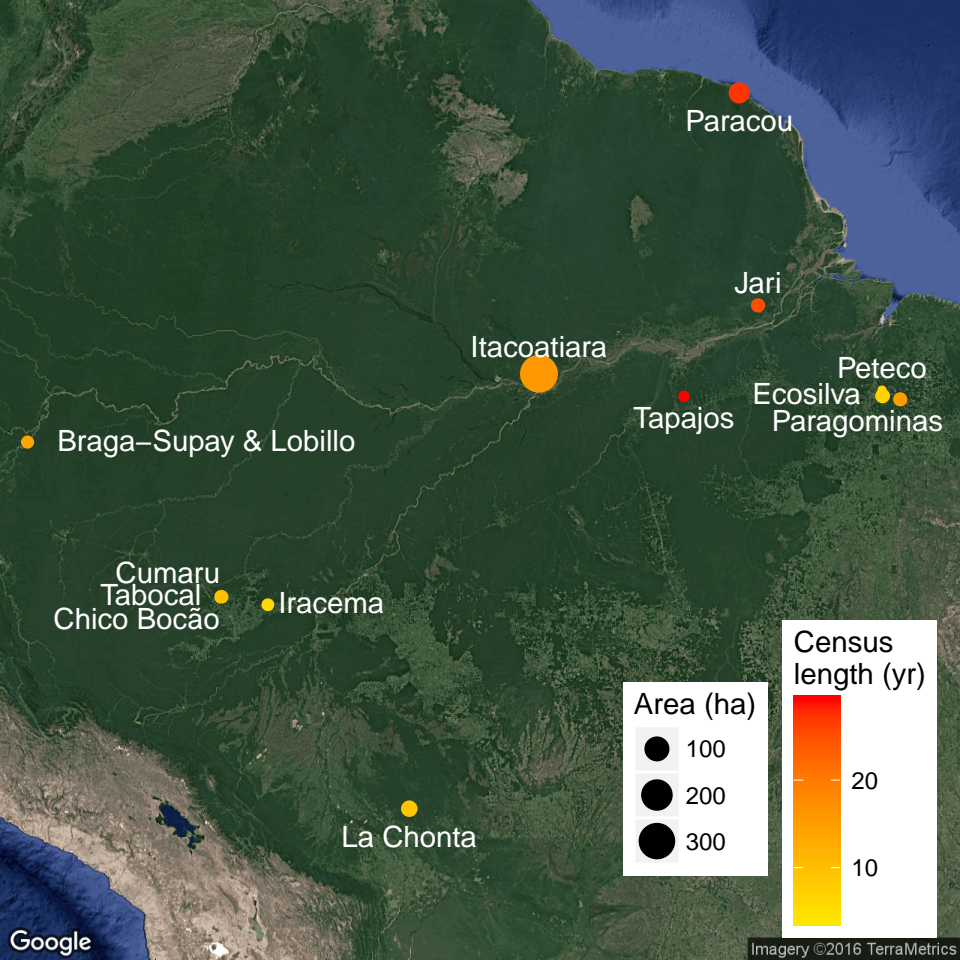

Supplement: supp [file elife_poa_e21394_Figure_1_figure_supplement_1.pdf › elife_poa_e21394_Figure_1_figure_supplement_1.pdf]

Fitted cumulative ACS change ( $\text{Mg C ha}^{-1}$ )

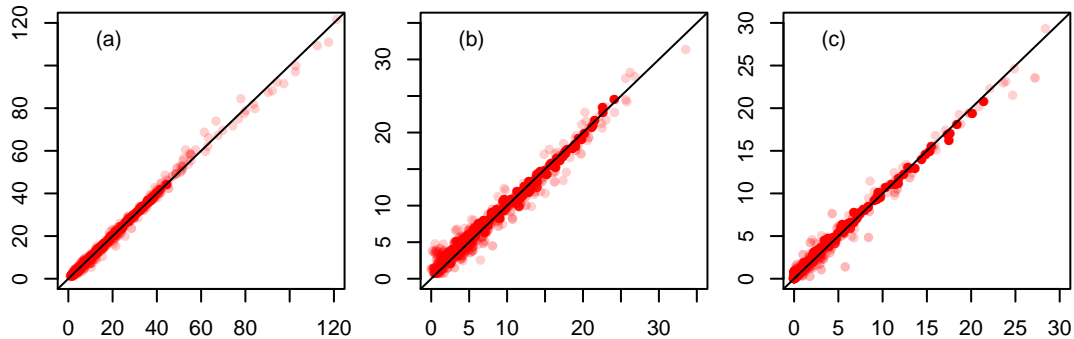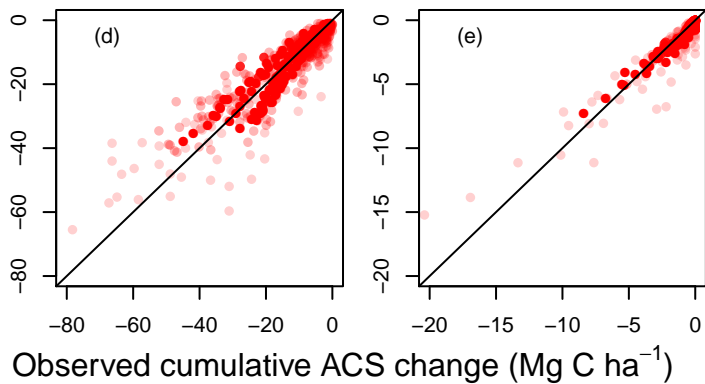

Supplement: supp [file elife_poa_e21394_Figure_2_figure_supplement_1.pdf › elife_poa_e21394_Figure_2_figure_supplement_1.pdf]
